# Supplementary material for: The Origin of the Information System in the RNA/Protein World: A Simulation Model of the Evolution of Translation and the Genetic Code
Source: Preprints.org preprint supplement (doi:10.20944/preprints201810.0127.v1), 2018-10-08
Supplement: Supplementary file 1 [file supplementary]

### Table 1. Evolution of the Genetic Code

The GNC primitive genetic code  
[4 codons]

|          |          |          |               |                   |          |
|----------|----------|----------|---------------|-------------------|----------|
|          | <b>U</b> | <b>C</b> | <b>A</b>      | <b>G</b>          |          |
| <b>G</b> | Alanine  | Alanine  | Aspartic acid | Serine or Glycine | <b>C</b> |

|          |          |          |               |                   |          |
|----------|----------|----------|---------------|-------------------|----------|
|          | <b>U</b> | <b>C</b> | <b>A</b>      | <b>G</b>          |          |
| <b>G</b> | Valine   | Alanine  | Aspartic acid | Serine or Glycine | <b>C</b> |



## The SNS primitive genetic code [16 codons]



|   | U      | C             | A             | G             |   |
|---|--------|---------------|---------------|---------------|---|
| G | Valine | Alanine       | Aspartic acid | Serine        | C |
|   |        |               | Glumatic acid | Glumatic acid | G |
| C | Valine | Glumatic acid | Glumatic acid | Glumatic acid | C |
|   |        |               |               |               | G |

(Di Giulio 2008)

|   | U       | C       | A             | G        |   |
|---|---------|---------|---------------|----------|---|
| G | Valine  | Alanine | Aspartic acid | Glycine  | C |
|   |         |         | Glumatic acid |          | G |
| C | Leucine | Proline | Histidine     | Arginine | C |
|   |         |         | Glutamine     |          | G |

(Ikehara 2002)



The universal genetic code  
[64 codons]

|                |          |                                 | Second letter                       |                                     |                                       |                                      |                             |                                     |   |
|----------------|----------|---------------------------------|-------------------------------------|-------------------------------------|---------------------------------------|--------------------------------------|-----------------------------|-------------------------------------|---|
|                |          |                                 | U                                   | C                                   | A                                     | G                                    |                             |                                     |   |
| Universal code | SNS code | GNC code                        | First letter                        | G                                   | Valine<br>GUU<br>GUC<br>GUA<br>GUG    | Alanine<br>GCU<br>GCC<br>GCA<br>GCG  | Aspartic acid<br>GAU<br>GAC | Glycine<br>GGU<br>GGC<br>GGA<br>GGG | U |
|                |          |                                 |                                     |                                     | C                                     |                                      |                             |                                     |   |
|                |          |                                 |                                     |                                     | A                                     |                                      |                             |                                     |   |
|                |          |                                 |                                     |                                     | G                                     |                                      |                             |                                     |   |
|                |          | C                               | Leucine<br>CUU<br>CUC<br>CUA<br>CUG | Proline<br>CCU<br>CCC<br>CCA<br>CCG | Histidine<br>CAU<br>CAC               | Arginine<br>CGU<br>CGC<br>CGA<br>CGG | U                           |                                     |   |
|                |          |                                 |                                     |                                     | C                                     |                                      |                             |                                     |   |
|                |          |                                 | A                                   | Isoleucine<br>AUU<br>AUC<br>AUA     | Threonine<br>ACU<br>ACC<br>ACA<br>ACG | Glutamine<br>CAA<br>CAG              |                             | A                                   |   |
|                |          |                                 |                                     |                                     |                                       |                                      |                             | G                                   |   |
|                | U        | Methionine<br>AUG (start codon) |                                     |                                     |                                       |                                      | U                           |                                     |   |
|                |          |                                 |                                     |                                     |                                       |                                      | C                           |                                     |   |
|                | U        | Phenylalanine<br>UUU<br>UUC     | Serine<br>UCU<br>UCC<br>UCA<br>UCG  | Asparagine<br>AAU<br>AAC            | Serine<br>AGU<br>AGC                  | U                                    |                             |                                     |   |
|                |          |                                 |                                     | C                                   |                                       |                                      |                             |                                     |   |
|                |          | Leucine<br>UUA<br>UUG           |                                     | (stop codon)<br>UAA<br>UAG          |                                       | Arginine<br>AGA<br>AGG               | A                           |                                     |   |
|                |          |                                 |                                     |                                     |                                       |                                      | G                           |                                     |   |
|                |          |                                 |                                     |                                     |                                       | U                                    |                             |                                     |   |
|                |          |                                 |                                     |                                     |                                       | C                                    |                             |                                     |   |
|                |          |                                 |                                     |                                     | A                                     |                                      |                             |                                     |   |
|                |          |                                 |                                     |                                     | G                                     |                                      |                             |                                     |   |
