# Supplementary material for: The Origin of the Information System in the RNA/Protein World: A Simulation Model of the Evolution of Translation and the Genetic Code
Source: Preprints.org preprint supplement (doi:10.20944/preprints201810.0127.v1), 2018-10-08
Supplement: Supplementary file 3 [file supplementary]

**Table 2.** Universal Genetic Code and its method of conversion to numerical codons

|              |       | Second letter                                                                            |                                                                                    |                                                                                                          |                                                                                                    |                                  |
|--------------|-------|------------------------------------------------------------------------------------------|------------------------------------------------------------------------------------|----------------------------------------------------------------------------------------------------------|----------------------------------------------------------------------------------------------------|----------------------------------|
|              |       | U (1)                                                                                    | C (2)                                                                              | A (3)                                                                                                    | G (4)                                                                                              |                                  |
| First letter | U (1) | UUU }<br>1 1 1 } Phe<br>UUC } F<br>1 1 2 }<br>UUA }<br>1 1 3 } Leu<br>UUG } L<br>1 1 4 } | UCU }<br>1 2 1 }<br>UCC } Ser<br>1 2 2 } S<br>UCA }<br>1 2 3 }<br>UCG }<br>1 2 4 } | UAU }<br>1 3 1 } Tyr<br>UAC } Y<br>1 3 2 }<br>UAA } STOP<br>1 3 3 } Ochre<br>UAG } STOP<br>1 3 4 } Amber | UGU }<br>1 4 1 } Cys<br>UGC } C<br>1 4 2 }<br>UGA } STOP<br>1 4 3 } Opal<br>UGG } Trp<br>1 4 4 } W | U (1)<br>C (2)<br>A (3)<br>G (4) |
|              | C (2) | CUU }<br>2 1 1 }<br>CUC } Leu<br>2 1 2 } L<br>CUA }<br>2 1 3 }<br>CUG }<br>2 1 4 }       | CCU }<br>2 2 1 }<br>CCC } Pro<br>2 2 2 } P<br>CCA }<br>2 2 3 }<br>CCG }<br>2 2 4 } | CAU }<br>2 3 1 } His<br>CAC } H<br>2 3 2 }<br>CAA }<br>2 3 3 } Gln<br>CAG } Q<br>2 3 4 }                 | CGU }<br>2 4 1 }<br>CGC } Arg<br>2 4 2 } R<br>CGA }<br>2 4 3 }<br>CGG }<br>2 4 4 }                 | U (1)<br>C (2)<br>A (3)<br>G (4) |
|              | A (3) | AUU }<br>3 1 1 }<br>AUC } Ile<br>3 1 2 } I<br>AUA }<br>3 1 3 }<br>AUG } Met<br>3 1 4 } M | ACU }<br>3 2 1 }<br>ACC } Thr<br>3 2 2 } T<br>ACA }<br>3 2 3 }<br>ACG }<br>3 2 4 } | AAU }<br>3 3 1 } Asn<br>AAC } N<br>3 3 2 }<br>AAA }<br>3 3 3 } Lys<br>AAG } K<br>3 3 4 }                 | AGU }<br>3 4 1 } Ser<br>AGC } S<br>3 4 2 }<br>AGA }<br>3 4 3 } Arg<br>AGG } R<br>3 4 4 }           | U (1)<br>C (2)<br>A (3)<br>G (4) |
|              | G (4) | GUU }<br>4 1 1 }<br>GUC } Val<br>4 1 2 } V<br>GUA }<br>4 1 3 }<br>GUG }<br>4 1 4 }       | GCU }<br>4 2 1 }<br>GCC } Ala<br>4 2 2 } A<br>GCA }<br>4 2 3 }<br>GCG }<br>4 2 4 } | GAU }<br>4 3 1 } Asp<br>GAC } D<br>4 3 2 }<br>GAA }<br>4 3 3 } Glu<br>GAG } E<br>4 3 4 }                 | GGU }<br>4 4 1 }<br>GGC } Gly<br>4 4 2 } G<br>GGA }<br>4 4 3 }<br>GGG }<br>4 4 4 }                 | U (1)<br>C (2)<br>A (3)<br>G (4) |
