# Supplementary material for: The Origin of the Information System in the RNA/Protein World: A Simulation Model of the Evolution of Translation and the Genetic Code
Source: Preprints.org preprint supplement (doi:10.20944/preprints201810.0127.v1), 2018-10-08
Supplement: Supplementary file 4 [file supplementary]

**Table 5.** Conversion of numerical codon sequence into amino acid sequence and vice-versa

| Numerical Codon Sequences                           | Corresponding Amino Sequences |
|-----------------------------------------------------|-------------------------------|
| 142343311141334                                     | CRICK                         |
| 431424243144312332                                  | DARWIN                        |
| 433312332122324434313331                            | EINSTEIN                      |
| 221131244422314313431                               | PYRAMID                       |
| 144423321434242                                     | WATER                         |
| 433423241323231                                     | EARTH                         |
| 424314433244313141423331                            | AMERICAN                      |
| 314424313432433331231423312344                      | MAIDENHAIR                    |
| 141244423131111312124231                            | CRAYFISH                      |
| 144423321434244321421331442433243313332433111244131 | WATERTANGERINEFRY             |

  

| The Randomly Generated Numerical Codon Sequences of Up to Length: 99                                | Corresponding Amino Acid Sequences |
|-----------------------------------------------------------------------------------------------------|------------------------------------|
| 314234241112241122214421123412142423124342442441142112423424411132124423224124334433133             | MQRFRSLASVCASSGGCFAAVYSAPSKEK      |
| 314121222221421224234214434212411221324323124114241234144132121412242334312113221222432111132243134 | MSPPAPQLELVPTTSLRQWYSVRKILPPDFYRZ  |
| 31411112144421243442114434232214244423213243312211441222423343444212243132244221413143              | MFSGLEAWSTCGHYESLVPARGLYRPVJ       |

  

| Amino Acid Sequences                                                                                      | Corresponding Numerical Codon Sequences                                                                                                                                                                                           |
|-----------------------------------------------------------------------------------------------------------|-----------------------------------------------------------------------------------------------------------------------------------------------------------------------------------------------------------------------------------|
| <b>The Count of all Possible Codon Sequences for the following Amino Sequence: 221,184</b>                | <b>Only the First 6 Codon Sequences Generated</b>                                                                                                                                                                                 |
| SDSYDPCTGL                                                                                                | 342432342132432223142323443213                                                                                                                                                                                                    |
| SDSYDPCTGL                                                                                                | 341432342132432223142323443213                                                                                                                                                                                                    |
| SDSYDPCTGL                                                                                                | 123432342132432223142323443213                                                                                                                                                                                                    |
| SDSYDPCTGL                                                                                                | 122432342132432223142323443213                                                                                                                                                                                                    |
| SDSYDPCTGL                                                                                                | 124432342132432223142323443213                                                                                                                                                                                                    |
| SDSYDPCTGL                                                                                                | 121432342132432223142323443213                                                                                                                                                                                                    |
| <b>The Count of all Possible Codon Sequences for the following Amino Sequence: 1.5912087619658678e+41</b> | <b>Only the First 6 Codon Sequences Generated</b>                                                                                                                                                                                 |
| SDSYDPCTGLLQKSPQCCNTDILGVANLDCHGPPSVPTSPSQFOASCVADGGRSARCCTLSLLGLALVCTDPVGI                               | 342432342132432223142323443213213233333342223233142142332323432313213443413423332213432142232443223223342413223323342223342233112233423342142413423432443443343342423343142142323213342213213443213423213413142323432223413443313 |
| SDSYDPCTGLLQKSPQCCNTDILGVANLDCHGPPSVPTSPSQFOASCVADGGRSARCCTLSLLGLALVCTDPVGI                               | 341432342132432223142323443213213233333342223233142142332323432313213443413423332213432142232443223223342413223323342223342233112233423342142413423432443443343342423343142142323213342213213443213423213413142323432223413443313 |
| SDSYDPCTGLLQKSPQCCNTDILGVANLDCHGPPSVPTSPSQFOASCVADGGRSARCCTLSLLGLALVCTDPVGI                               | 123432342132432223142323443213213233333342223233142142332323432313213443413423332213432142232443223223342413223323342223342233112233423342142413423432443443343342423343142142323213342213213443213423213413142323432223413443313 |
| SDSYDPCTGLLQKSPQCCNTDILGVANLDCHGPPSVPTSPSQFOASCVADGGRSARCCTLSLLGLALVCTDPVGI                               | 122432342132432223142323443213213233333342223233142142332323432313213443413423332213432142232443223223342413223323342223342233112233423342142413423432443443343342423343142142323213342213213443213423213413142323432223413443313 |
| SDSYDPCTGLLQKSPQCCNTDILGVANLDCHGPPSVPTSPSQFOASCVADGGRSARCCTLSLLGLALVCTDPVGI                               | 124432342132432223142323443213213233333342223233142142332323432313213443413423332213432142232443223223342413223323342223342233112233423342142413423432443443343342423343142142323213342213213443213423213413142323432223413443313 |
| SDSYDPCTGLLQKSPQCCNTDILGVANLDCHGPPSVPTSPSQFOASCVADGGRSARCCTLSLLGLALVCTDPVGI                               | 121432342132432223142323443213213233333342223233142142332323432313213443413423332213432142232443223223342413223323342223342233112233423342142413423432443443343342423343142142323213342213213443213423213413142323432223413443313 |

|                                                                                              |  |                                                     |  |
|----------------------------------------------------------------------------------------------|--|-----------------------------------------------------|--|
| <b>The Count of all Possible Codon Sequences for the following Amino Sequence: 3,538,944</b> |  | <b>Only the First 4 Codon Sequences Generated</b>   |  |
| DPCTGLLGLAV                                                                                  |  | 432223142323443213213443213423413                   |  |
| DPCTGLLGLAV                                                                                  |  | 431223142323443213213443213423413                   |  |
| DPCTGLLGLAV                                                                                  |  | 432222142323443213213443213423413                   |  |
| DPCTGLLGLAV                                                                                  |  | 431222142323443213213443213423413                   |  |
| <b>DNA Codon Sequences</b>                                                                   |  | <b>The Corresponding Numerical Codon Sequences</b>  |  |
| TGCAGAATTTGTAAG                                                                              |  | 142343311141334                                     |  |
| GATGCGCGATGGATCAAC                                                                           |  | 431424243144312332                                  |  |
| GAAATCAACTCCACGGAGATAAAT                                                                     |  | 433312332122324434313331                            |  |
| CCTTATCGGGCCATGATAGAT                                                                        |  | 221131244422314313431                               |  |
| TGGGCAACTGAGCGC                                                                              |  | 144423321434242                                     |  |
| GAAGCACGTACACAT                                                                              |  | 433423241323231                                     |  |
| GCGATGGAACGGATATGTGCAAT                                                                      |  | 424314433244313141423331                            |  |
| ATGGCGATAGACGAAATCATGCAATCAGG                                                                |  | 314424313432433331231423312344                      |  |
| TGTCGGGCATATTTTATCTCGCAT                                                                     |  | 141244423131111312124231                            |  |
| TGGGCAACTGAGCGGACTGCTAATGGCGAACGAATAACGAATTCGGTAT                                            |  | 144423321434244321421331442433243313332433111244131 |  |
