# Supplementary material for: The Origin of the Information System in the RNA/Protein World: A Simulation Model of the Evolution of Translation and the Genetic Code
Source: Preprints.org preprint supplement (doi:10.20944/preprints201810.0127.v1), 2018-10-08
Supplement: Supplementary file 4 [file Table 3.docx]

**Table 3.** Universal Genetic code showing numerical codons

|  | 1 | 2 | 3 | 4 |  |
| --- | --- | --- | --- | --- | --- |
| 1 | 111  112 **F (Phe)**  113  114 **L (Leu)** | 121  122  123  124 **S (Ser**) | 131  132 **Y (Tyr)**  133 **X** **(Stop)**  134 **Z (Stop)** | 141  142 **C (Cys**)  143 **J (Stop)**  144 **W (Trp)** | 1  2  3  4 |
| 2 | 211  212  213  214 **L (Leu)** | 221  222  223  224 **P (Pro)** | 231  232 **H (His)**  233  234 **Q (Gln)** | 241  242  243  244 **R (Arg)** | 1  2  3  4 |
| 3 | 311  312  313 **I (Ile)**  314 **M (Met) (Start)** | 321  322  323  324 **T (Thr)** | 331  332 **N (Asn)**  333  334 **K (Lys)** | 341  342 **S (Ser)**  343  344 **(R) Arg** | 1  2  3  4 |
| 4 | 411  412  413  414 **V (Val)** | 421  422  423  424 **A (Ala)** | 431  432 **D (Asp)**  433  434 **E (Glu)** | 441  442  443  444 **G (Gly)** | 1  2  3  4 |
