# Supplementary material for: The Origin of the Information System in the RNA/Protein World: A Simulation Model of the Evolution of Translation and the Genetic Code
Source: Preprints.org preprint supplement (doi:10.20944/preprints201810.0127.v1), 2018-10-08
Supplement: Supplementary file 8 [file supplementary]

### Table 1. Evolution of the Genetic Code

The GNC primitive genetic code  
[4 codons]

|          |          |          |               |                   |          |
|----------|----------|----------|---------------|-------------------|----------|
|          | <b>U</b> | <b>C</b> | <b>A</b>      | <b>G</b>          |          |
| <b>G</b> | Alanine  | Alanine  | Aspartic acid | Serine or Glycine | <b>C</b> |

|          |          |          |               |                   |          |
|----------|----------|----------|---------------|-------------------|----------|
|          | <b>U</b> | <b>C</b> | <b>A</b>      | <b>G</b>          |          |
| <b>G</b> | Valine   | Alanine  | Aspartic acid | Serine or Glycine | <b>C</b> |



## The SNS primitive genetic code [16 codons]



|   | U      | C             | A             | G             |   |
|---|--------|---------------|---------------|---------------|---|
| G | Valine | Alanine       | Aspartic acid | Serine        | C |
|   |        |               | Glumatic acid | Glumatic acid | G |
| C | Valine | Glumatic acid | Glumatic acid | Glumatic acid | C |
|   |        |               |               |               | G |

(Di Giulio 2008)

|   | U       | C       | A             | G        |   |
|---|---------|---------|---------------|----------|---|
| G | Valine  | Alanine | Aspartic acid | Glycine  | C |
|   |         |         | Glumatic acid |          | G |
| C | Leucine | Proline | Histidine     | Arginine | C |
|   |         |         | Glutamine     |          | G |

(Ikehara 2002)

The universal genetic code  
[64 codons]

|                |          |          | Second letter                   |                                       |                                    |                                          |                                     |                                     |              |                                      |                  |
|----------------|----------|----------|---------------------------------|---------------------------------------|------------------------------------|------------------------------------------|-------------------------------------|-------------------------------------|--------------|--------------------------------------|------------------|
|                |          |          | U                               | C                                     | A                                  | G                                        |                                     |                                     |              |                                      |                  |
| Universal code | SNS code | GNC code | First letter                    | G                                     | Valine<br>GUU<br>GUC<br>GUA<br>GUG | Alanine<br>GCU<br>GCC<br>GCA<br>GCG      | Aspartic acid<br>GAU<br>GAC         | Glycine<br>GGU<br>GGC<br>GGA<br>GGG | Third letter |                                      |                  |
|                |          |          |                                 |                                       |                                    |                                          | Glutamic acid<br>GAA<br>GAG         |                                     |              |                                      |                  |
|                |          |          |                                 |                                       | C                                  | Leucine<br>CUU<br>CUC<br>CUA<br>CUG      | Proline<br>CCU<br>CCC<br>CCA<br>CCG | Histidine<br>CAU<br>CAC             |              | Arginine<br>CGU<br>CGC<br>CGA<br>CGG | U<br>C<br>A<br>G |
|                |          |          |                                 |                                       |                                    |                                          |                                     | Glutamine<br>CAA<br>CAG             |              |                                      |                  |
|                |          | A        | Isoleucine<br>AUU<br>AUC<br>AUA | Threonine<br>ACU<br>ACC<br>ACA<br>ACG | Asparagine<br>AAU<br>AAC           | Serine<br>AGU<br>AGC                     | U<br>C                              |                                     |              |                                      |                  |
|                |          |          | Methionine<br>AUG (start codon) |                                       | Lysine<br>AAA<br>AAG               | Arginine<br>AGA<br>AGG                   | A<br>G                              |                                     |              |                                      |                  |
|                |          | U        | Phenylalanine<br>UUU<br>UUC     | Serine<br>UCU<br>UCC<br>UCA<br>UCG    | Tyrosine<br>UAU<br>UAC             | Cysteine<br>UGU<br>UGC                   | U<br>C                              |                                     |              |                                      |                  |
|                |          |          | Leucine<br>UUA<br>UUG           |                                       | (stop codon)<br>UAA<br>UAG         | (stop codon)<br>UGA<br>Tryptophan<br>UGG | A<br>G                              |                                     |              |                                      |                  |
