# Supplementary material for: The Origin of the Information System in the RNA/Protein World: A Simulation Model of the Evolution of Translation and the Genetic Code
Source: Preprints.org preprint supplement (doi:10.20944/preprints201810.0127.v1), 2018-10-08
Supplement: Supplementary file 8 [file Table 5.docx]

**Table 5.** Conversion of numerical codon sequence into amino acid sequence

and vice-versa

| **Numerical Codon Sequences** | **Corresponding Amino Sequences** |
| --- | --- |
| **142**343**311**141**334** | **C**R**I**C**K** |
| **431**424**243**144**312**332 | **D**A**R**W**I**N |
| **433**312**332**122**324**434**313**331 | **E**I**N**S**T**E**I**N |
| **221**131**244**422**314**313**431** | **P**Y**R**A**M**I**D** |
| **144**423**321**434**242** | **W**A**T**E**R** |
| **433**423**241**323**231** | **E**A**R**T**H** |
| **424**314**433**244**313**141**423**331 | **A**M**E**R**I**C**A**N |
| **314**424**313**432**433**331**231**423**312**344 | **M**A**I**D**E**N**H**A**I**R |
| **141**244**423**131**111**312**124**231 | **C**R**A**Y**F**I**S**H |
| **144**423**321**434**244**321**421**331**442**433**243**313**332**433**111**244**131** | **W**A**T**E**R**T**A**N**G**E**R**I**N**E**F**R**Y** |

| **The Randomly Generated Numerical Codon Sequences of Up to Length: 99** | **Corresponding Amino Acid Sequences** |
| --- | --- |
| **314**234**241**112**241**122**214**421**123**412**142**423**124**342**442**441**142**112**423**424**411**132**124**423**224**124**334**433**133** | **M**Q**R**F**R**S**L**A**S**V**C**A**S**S**G**G**C**F**A**A**V**Y**S**A**P**S**K**E**X** |
| **314**121**222**221**421**224**234**214**434**212**411**221**324**323**124**114**241**234**144**132**121**412**242**334**312**113**221**222**432**111**132**243**134** | **M**S**P**P**A**P**Q**L**E**L**V**P**T**T**S**L**R**Q**W**Y**S**V**R**K**I**L**P**P**D**F**Y**R**Z** |
| **314**111**121**444**212**434**421**144**342**322**142**444**232**132**433**122**114**412**222**423**343**444**212**243**132**244**221**413**143** | **M**F**S**G**L**E**A**W**S**T**C**G**H**Y**E**S**L**V**P**A**R**G**L**R**Y**R**P**V**J** |

| **Amino Acid Sequences** | **Corresponding Numerical Codon Sequences** |
| --- | --- |
| **The Count of all Possible Codon Sequences for the following Amino Sequence: 221,184** | **Only the First 6 Codon Sequences Generated** |
| **S**D**S**Y**D**P**C**T**G**L | **342**432**342**132**432**223**142**323**443**213 |
| **S**D**S**Y**D**P**C**T**G**L | **341**432**342**132**432**223**142**323**443**213 |
| **S**D**S**Y**D**P**C**T**G**L | **123**432**342**132**432**223**142**323**443**213 |
| **S**D**S**Y**D**P**C**T**G**L | **122**432**342**132**432**223**142**323**443**213 |
| **S**D**S**Y**D**P**C**T**G**L | **124**432**342**132**432**223**142**323**443**213 |
| **S**D**S**Y**D**P**C**T**G**L | **121**432**342**132**432**223**142**323**443**213 |
| **The Count of all Possible Codon Sequences for the following Amino Sequence: 1.5912087619658678e+41** | **Only the First 6 Codon Sequences Generated** |
| **S**D**S**Y**D**P**C**T**G**L**L**Q**K**S**P**Q**C**C**N**T**D**I**L**G**V**A**N**L**D**C**H**G**P**P**S**V**P**T**S**P**S**Q**F**Q**A**S**C**V**A**D**G**G**R**S**A**R**C**C**T**L**S**L**L**G**L**A**L**V**C**T**D**P**V**G**I** | **342**432**342**132**432**223**142**323**443**213**213**233**333**342**223**233**142**142**332**323**432**313**213**443**413**423**332**213**432**142**232**443**223**223**342**413**223**323**342**223**342**233**112**233**423**342**142**413**423**432**443**443**343**342**423**343**142**142**323**213**342**213**213**443**213**423**213**413**142**323**432**223**413**443**313** |
| **S**D**S**Y**D**P**C**T**G**L**L**Q**K**S**P**Q**C**C**N**T**D**I**L**G**V**A**N**L**D**C**H**G**P**P**S**V**P**T**S**P**S**Q**F**Q**A**S**C**V**A**D**G**G**R**S**A**R**C**C**T**L**S**L**L**G**L**A**L**V**C**T**D**P**V**G**I** | **341**432**342**132**432**223**142**323**443**213**213**233**333**342**223**233**142**142**332**323**432**313**213**443**413**423**332**213**432**142**232**443**223**223**342**413**223**323**342**223**342**233**112**233**423**342**142**413**423**432**443**443**343**342**423**343**142**142**323**213**342**213**213**443**213**423**213**413**142**323**432**223**413**443**313** |
| **S**D**S**Y**D**P**C**T**G**L**L**Q**K**S**P**Q**C**C**N**T**D**I**L**G**V**A**N**L**D**C**H**G**P**P**S**V**P**T**S**P**S**Q**F**Q**A**S**C**V**A**D**G**G**R**S**A**R**C**C**T**L**S**L**L**G**L**A**L**V**C**T**D**P**V**G**I** | **123**432**342**132**432**223**142**323**443**213**213**233**333**342**223**233**142**142**332**323**432**313**213**443**413**423**332**213**432**142**232**443**223**223**342**413**223**323**342**223**342**233**112**233**423**342**142**413**423**432**443**443**343**342**423**343**142**142**323**213**342**213**213**443**213**423**213**413**142**323**432**223**413**443**313** |
| **S**D**S**Y**D**P**C**T**G**L**L**Q**K**S**P**Q**C**C**N**T**D**I**L**G**V**A**N**L**D**C**H**G**P**P**S**V**P**T**S**P**S**Q**F**Q**A**S**C**V**A**D**G**G**R**S**A**R**C**C**T**L**S**L**L**G**L**A**L**V**C**T**D**P**V**G**I** | **122**432**342**132**432**223**142**323**443**213**213**233**333**342**223**233**142**142**332**323**432**313**213**443**413**423**332**213**432**142**232**443**223**223**342**413**223**323**342**223**342**233**112**233**423**342**142**413**423**432**443**443**343**342**423**343**142**142**323**213**342**213**213**443**213**423**213**413**142**323**432**223**413**443**313** |
| **S**D**S**Y**D**P**C**T**G**L**L**Q**K**S**P**Q**C**C**N**T**D**I**L**G**V**A**N**L**D**C**H**G**P**P**S**V**P**T**S**P**S**Q**F**Q**A**S**C**V**A**D**G**G**R**S**A**R**C**C**T**L**S**L**L**G**L**A**L**V**C**T**D**P**V**G**I** | **124**432**342**132**432**223**142**323**443**213**213**233**333**342**223**233**142**142**332**323**432**313**213**443**413**423**332**213**432**142**232**443**223**223**342**413**223**323**342**223**342**233**112**233**423**342**142**413**423**432**443**443**343**342**423**343**142**142**323**213**342**213**213**443**213**423**213**413**142**323**432**223**413**443**313** |
| **S**D**S**Y**D**P**C**T**G**L**L**Q**K**S**P**Q**C**C**N**T**D**I**L**G**V**A**N**L**D**C**H**G**P**P**S**V**P**T**S**P**S**Q**F**Q**A**S**C**V**A**D**G**G**R**S**A**R**C**C**T**L**S**L**L**G**L**A**L**V**C**T**D**P**V**G**I** | **121**432**342**132**432**223**142**323**443**213**213**233**333**342**223**233**142**142**332**323**432**313**213**443**413**423**332**213**432**142**232**443**223**223**342**413**223**323**342**223**342**233**112**233**423**342**142**413**423**432**443**443**343**342**423**343**142**142**323**213**342**213**213**443**213**423**213**413**142**323**432**223**413**443**313** |
| **The Count of all Possible Codon Sequences for the following Amino Sequence: 3,538,944** | **Only the First 4 Codon Sequences Generated** |
| **D**P**C**T**G**L**L**G**L**A**V** | **432**223**142**323**443**213**213**443**213**423**413** |
| **D**P**C**T**G**L**L**G**L**A**V** | **431**223**142**323**443**213**213**443**213**423**413** |
| **D**P**C**T**G**L**L**G**L**A**V** | **432**222**142**323**443**213**213**443**213**423**413** |
| **D**P**C**T**G**L**L**G**L**A**V** | **431**222**142**323**443**213**213**443**213**423**413** |

| **DNA Codon Sequences** | **The Corresponding Numerical Codon Sequences** |
| --- | --- |
| **T**G**C**A**G**A**A**T**T**T**G**T**A**A**G** | **1**4**2**3**4**3**3**1**1**1**4**1**3**3**4** |
| **G**A**T**G**C**G**C**G**A**T**G**G**A**T**C**A**A**C | **4**3**1**4**2**4**2**4**3**1**4**4**3**1**2**3**3**2 |
| **G**A**A**A**T**C**A**A**C**T**C**C**A**C**G**G**A**G**A**T**A**A**A**T | **4**3**3**3**1**2**3**3**2**1**2**2**3**2**4**4**3**4**3**1**3**3**3**1 |
| **C**C**T**T**A**T**C**G**G**G**C**C**A**T**G**A**T**A**G**A**T** | **2**2**1**1**3**1**2**4**4**4**2**2**3**1**4**3**1**3**4**3**1** |
| **T**G**G**G**C**A**A**C**T**G**A**G**C**G**C** | **1**4**4**4**2**3**3**2**1**4**3**4**2**4**2** |
| **G**A**A**G**C**A**C**G**T**A**C**A**C**A**T** | **4**3**3**4**2**3**2**4**1**3**2**3**2**3**1** |
| **G**C**G**A**T**G**G**A**A**C**G**G**A**T**A**T**G**T**G**C**A**A**A**T | **4**2**4**3**1**4**4**3**3**2**4**4**3**1**3**1**4**1**4**2**3**3**3**1 |
| **A**T**G**G**C**G**A**T**A**G**A**C**G**A**A**A**A**T**C**A**T**G**C**A**A**T**C**A**G**G | **3**1**4**4**2**4**3**1**3**4**3**2**4**3**3**3**3**1**2**3**1**4**2**3**3**1**2**3**4**4 |
| **T**G**T**C**G**G**G**C**A**T**A**T**T**T**T**A**T**C**T**C**G**C**A**T | **1**4**1**2**4**4**4**2**3**1**3**1**1**1**1**3**1**2**1**2**4**2**3**1 |
| **T**G**G**G**C**A**A**C**T**G**A**G**C**G**G**A**C**T**G**C**T**A**A**T**G**G**C**G**A**A**C**G**A**A**T**A**A**A**C**G**A**A**T**T**T**C**G**G**T**A**T** | **1**4**4**4**2**3**3**2**1**4**3**4**2**4**4**3**2**1**4**2**1**3**3**1**4**4**2**4**3**3**2**4**3**3**1**3**3**3**2**4**3**3**1**1**1**2**4**4**1**3**1** |
