# Supplementary figures and images for: The Origin of the Information System in the RNA/Protein World: A Simulation Model of the Evolution of Translation and the Genetic Code
Source: Preprints.org preprint supplement (doi:10.20944/preprints201810.0127.v1), 2018-10-08

**Table 2.** Universal Genetic Code and its method of conversion to numerical codons

**
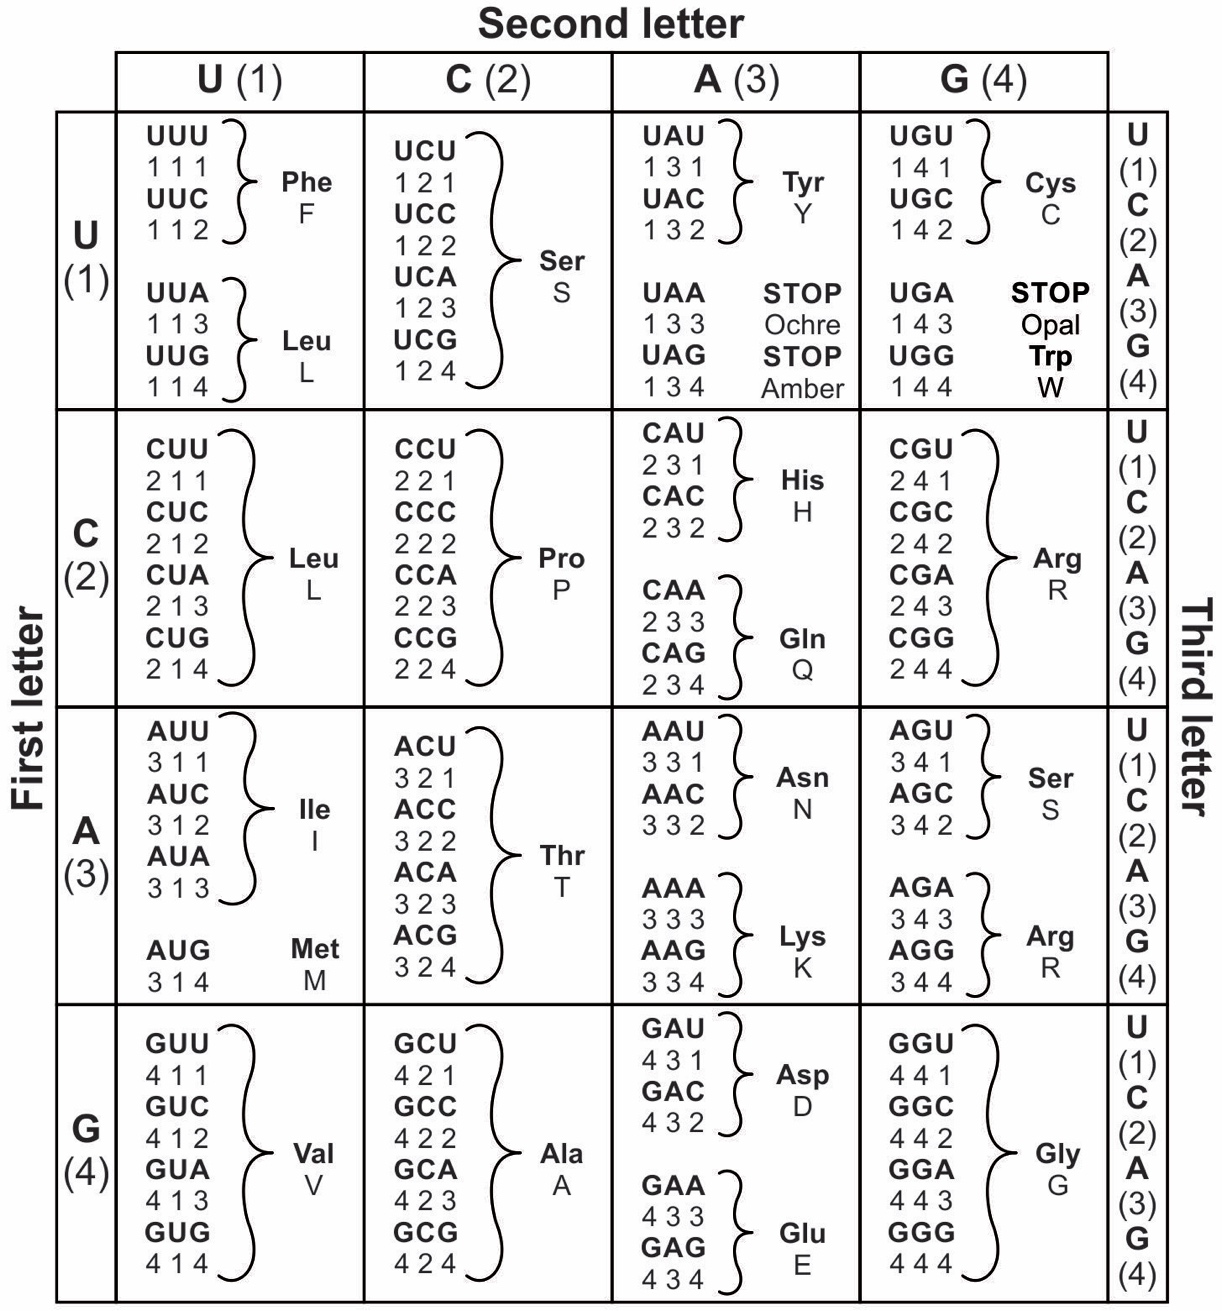
**

Supplement: Supplementary file 1 [file supplementary]
